# Supplementary material for: Should compression bandage be performed after total knee arthroplasty? A meta-analysis of randomized controlled trials
Source: J Orthop Surg Res. 2020 Feb 14;15:52. doi: 10.1186/s13018-019-1527-9 (PMC7023752; doi:10.1186/s13018-019-1527-9)
Supplement: Supplementary file 1 — Additional file 1. Raw data. [file 13018_2019_1527_MOESM1_ESM.xlsx]

## Sheet: Sheet1
Pinsornsak 2103	加压组	非加压组		Munk 2102	加压组	非加压组		术后疼痛1d静态	加压组		N	非加压组		N		术后肢体肿胀1d（大腿）	加压组		N	非加压组		N
例数	30	30		例数	43	42		Pinsornsak 2103	3.43	2.21	30	3.8	2.48	30		Kayamori 2016	41.6	4.5	34	41.8	3.6	23
引流量				肢体肿胀				Brock 2107	4.5	2.7	24	3.9	2.7	25		Matthews 2018	51	6	51	51	6	51
术后24小时	269.83 ± 158.27	316.00 ± 174.66		膝（髌上1cm）				Pornrattanamaneewong 2018	1.5	1.9	35	1.5	2	35		Pinsornsak 2103	45.91	7.21	30	45.41	5.61	30
术后48小时	149.00 ± 132.94	151.00 ± 101.08		术后1d	46.00 ± 4	46.00 ± 5		Matthews 2018	8	3	51	7	3	51		Yu 2018	46.23	3.49	44	45.9	4.19	44
总计	418.83 ± 243.93	467.00 ± 233.95		术后2d	48.00 ± 4	47.00 ± 4		Yu 2018	2.39	1.91	44	1.91	1.6	44
Hct%				术后7d	47.00 ± 4	47.00 ± 4										术后肢体肿胀1d（膝）	加压组			非加压组
术后24小时	31.97 ± 3.15	32.70 ± 4.08		术后14d	46.00 ± 4	45.00 ± 6		术后疼痛1d动态	加压组			非加压组				Matthews 2018	45	4	51	45	5	51
术后48小时	32.37 ± 2.88	32.40 ± 3.29		术后1m	45.00 ±4	44.00 ±6										Munk 2102	46	4	43	46	5	42
总体减少	3.43 ± 2.62	2.57 ± 3.06		小腿				Brock 2107	6	2.6	24	5.1	2.6	25		Yu 2018	40.4	2.66	44	40.26	3.28	44
输血量				术后1d	38.00 ± 3	38.00 ± 4		Pornrattanamaneewong 2018	1.5	2.3	35	2	2.5	35
术后24小时	0.17 ± 0.38	0.20 ± 0.48		术后2d	39.00 ± 3	39.00 ± 3		Matthews 2018	7	3	51	6	3	51		术后肢体肿胀1d（小腿）	加压组			非加压组
术后48小时	0.07 ± 0.25	0.10 ± 0.31		术后7d	39.00 ± 3	40.00 ± 3		Yu 2018	6.23	1.89	44	5.89	1.62	44
输血人数	7	7		术后14d	38.00 ± 3	38.00 ± 3										Matthews 2018	40	4	51	40	4	51
术后疼痛				术后1m	37.00 ± 4	38.00 ± 4		术后疼痛2d静态	加压组			非加压组				Munk 2102	38	3	43	38	4	42
术后24小时	3.43 ± 2.21	3.80 ± 2.48														Pinsornsak 2103	34.43	4.29	30	35.46	6	30
术后48小时	3.27 ± 2.41	3.57 ± 1.89		Kayamori 2016	加压组	非加压组		Brock 2107	4.2	2.3	24	2.4	2.3	25		Yu 2018	35.2	2.44	44	34.95	2.63	44
肢体肿胀				例数	34	23		Matthews 2018	7	2	51	7	3	51
术后24小时				肢体肿胀				Pinsornsak 2103	3.27	2.41	30	3.57	1.89	30
大腿	45.91 ± 7.21	45.41 ± 5.61		大腿（10cm）				Pornrattanamaneewong 2018	1.5	2	35	1.5	2.3	35
小腿	34.43 ± 4.29	35.46 ± 6.00		术后1d	41.6 ± 4.5	41.8 ± 3.6
				术后7d	44.3 ± 4.9	45.2 ± 4.1		术后疼痛2d动态	加压组			非加压组
Brock 2107	加压组	非加压组		ROM
例数	24	25		屈曲				Brock 2107	5.2	2.7	24	4.5	2.3	25
术后疼痛				术后1d	62.3 ± 14.5	60.2 ± 10.0		Matthews 2018	8	2	51	7	3	51
静态				术后2d	72.6 ± 12.3	76.0 ± 12.6		Pornrattanamaneewong 2018	1.7	2.3	35	1.3	2	35
术后1d	4.5 ± 2.7	3.9 ± 2.7		术后3d	80.8 ± 11.3	82.1 ± 12.7
术后2d	4.2 ± 2.3	2.4 ± 2.3		术后4d	82.4 ± 12.8	88.3 ± 12.9		术后失血量（引流量）	加压组			非加压组
动态				术后5d	82.5 ± 7.1	88.6 ± 10.8		Kayamori 2016	835.9	380.7	34	856.3	338.1	23
术后1d	6.0 ± 2.6	5.1 ± 2.6		术后6d	88.3 ± 9.0	86.8 ± 7.6		Pinsornsak 2103	418.83	243.93	30	467	233.95	30
术后2d	5.2 ± 2.7	4.5 ± 2.3		术后7d	89.3 ± 8.0	90.1 ± 8.8		Pornrattanamaneewong 2018	313.6	232.9	35	324.3	166.6	35
术后6w	2.8 ± 2.2	2.6 ± 1.6		失血量	835.9 ± 380.7	856.3 ± 338.1		Yu 2018	529.3	232.62	44	558.94	252.74	44
Pornrattanamaneewong 2018	加压组	非加压组		Yu 2018	加压组	非加压组		术后失血量（Hct）	加压组			非加压组
例数	35	35		例数	44	44		Pinsornsak 2103	32.37	2.88	30	32.4	3.29	30
失血量				术后肿胀				Pornrattanamaneewong 2018	32	3.1	35	32.1	3.5	35
隐性失血量	221.2 ± 233.3	158.5 ± 186.7		大腿				Yu 2018	28.75	10.01	44	29.27	12.21	44
RBC降低量	291.8 ± 214.2	227.9 ± 140.5		术后1d	46.23 ± 3.49	45.90 ± 4.19
引流RBC量	117.4 ± 90.2	117.8 ± 61.1		术后3d	46.87 ± 3.68	46.57 ± 4.22		术后ROM1d	加压组			非加压组
输RBC量	46.7 ± 95.6	48.4 ± 98.5		术后3w	45.79 ± 3.46	45.53 ± 4.14
Hct 24h	32.6 ± 4.0	31.7 ± 3.3		膝				Kayamori 2016	62.3	14.5	34	60.2	10	23
Hct 48h	32.0 ± 3.1	32.1 ± 3.5		术后1d	40.40 ± 2.66	40.26 ± 3.28		Matthews 2018	68	32	51	70	29	51
引流量	313.6 ± 232.9	324.3 ± 166.6		术后3d	41.31 ± 2.62	41.03 ± 3.37		Pornrattanamaneewong 2018	84.9	10	35	85.3	10.4	35
术后疼痛				术后3w	38.97 ± 2.62	38.82 ± 3.25		Yu 2018	77.5	20	44	78.3	17.39	44
静态				小腿
术后1d	1.5 ± 1.9	1.5 ± 2.0		术后1d	35.20 ± 2.44	34.95 ± 2.63		并发症	加压组		非加压组
术后2d	1.5 ± 2.0	1.5 ± 2.3		术后3d	35.30 ± 2.52	35.07 ± 2.67
动态				术后3w	34.82 ± 2.39	34.54 ± 2.46		Matthews 2018	3	51	6	51
术后1d	1.5 ± 2.3	2.0 ± 2.5		术后Hb降低				Yu 2018	2	44	2	44
术后2d	1.7 ± 2.3	1.3 ± 2.0		术后1d	18.91 ± 7.68	18.45 ± 8.17
吗啡用量				术后3d	28.75 ± 10.01	29.27 ± 12.21
术后1d	1.0 ± 0.9	1.9 ± 2.1		术后失血
术后2d	1.4 ± 2.0	1.5 ± 1.9		术后1d	252.48 ± 124.92	250.75 ± 106.60
总计	2.4 ± 2.4	3.4 ± 2.9		术后3d	529.30 ± 232.62	558.94 ± 252.74
ROM	84.9 ± 10.0	85.3 ± 10.4		术中失血	188.70 ± 80.33	178.14 ± 77.65
				术后疼痛
Matthews 2018	加压组	非加压组		静态
例数	51	51		术后1d	2.39 ± 1.91	1.91 ± 1.60
肢体肿胀				术后3d	0.39 ± 0.72	0.41 ± 0.62
大腿（10cm）				动态
术后1d	51 ± 6	51 ± 6		术后1d	6.23 ± 1.89	5.89 ± 1.62
术后2d	53 ± 6	53 ± 7		术后3d	2.16 ± 0.94	1.98 ± 0.93
术后28d	47 ± 6	47 ± 6		ROM
膝				术后1d	77.50 ± 20.00	78.30 ± 17.39
术后1d	45 ± 4	45 ± 5		术后3d	99.16 ± 9.36	97.68 ± 10.43
术后2d	46 ± 4	46 ± 4		HSS	80.55 ± 5.36	79.34 ± 4.66
术后28d	42 ± 5	42 ± 5		并发症例数	2	2
小腿
术后1d	40 ± 4	40 ± 4
术后2d	41 ± 4	41 ± 4
术后28d	37 ± 4	37 ± 4
ROM
屈曲
术后1d	56 ± 25	58 ± 22
术后2d	64 ± 20	63 ± 23
术后28d	101 ± 20	102 ± 20
伸直
术后1d	12 ± 7	12 ± 7
术后2d	9 ± 5	10 ± 6
术后28d	6 ± 14	4 ± 4
术后疼痛
最大疼痛
术后1d	8 ± 3	7 ± 3
术后2d	7 ± 2	7 ± 3
术后28d	4 ± 3	3 ± 3
理疗痛
术后1d	7 ± 3	6 ± 3
术后2d	8 ± 2	7 ± 3
术后28d	5 ± 2	5 ± 3
并发症
例数	3	6

## Sheet: Sheet2
1615.2
1737.5
2526.2
1736.5
6324
2795
2646
4182
4910.5
6089.6
34562.5
